# Supplementary material
Source: MDPI journal article supplement (https://www.mdpi.com/2075-163X/13/5/620)
Supplement: s1 [file s1]

# Supplementary Material: Mechanism for the Combined Li–Na Ionic Conductivity in Sugilite (Fe<sub>2</sub>Na<sub>2</sub>K[Li<sub>3</sub>Si<sub>12</sub>O<sub>30</sub>])-Type Compounds

So-Hyun Park \*, Carsten Paulmann, Markus Hoelzel and Rupert Hochleitner

**Supplementary S1.** Atomic parameters refined with HRNPD at 973 K of (Fe<sub>1.3(2)</sub>Mn<sub>0.3(0.1)</sub>Al<sub>0.4(0.1)</sub>)Na<sub>2.0(2)</sub>K<sub>1.03(1)</sub>[Li<sub>3</sub>Si<sub>12.000(3)</sub>O<sub>30</sub>], refined with HRNPD at 973 K. An occupation value of 0.1108 corresponds to full occupation at A sites with Fe<sub>1.3(2)</sub>Mn<sub>0.3(0.1)</sub>Al<sub>0.4(0.1)</sub>, normalized by the neutron elastic scattering length of Fe. The other sites were refined with full occupation.

| Site            | Type | Coordinates |           |           | Eigenvalues of ADPs [ $\text{\AA}^2$ ] |                |                |
|-----------------|------|-------------|-----------|-----------|----------------------------------------|----------------|----------------|
|                 |      | x           | y         | z         | U <sub>1</sub>                         | U <sub>2</sub> | U <sub>3</sub> |
| A               | Fe   | 0.33333     | 0.66667   | 0.25      | 0.008060                               | 0.008060       | 0.008325       |
| B               | Na   | 0.33333     | 0.66667   | 0.5       | 0.019981                               | 0.019981       | 0.087654       |
| C               | K    | 0           | 0         | 0.25      | 0.026607                               | 0.130289       | 0.130289       |
| T <sup>II</sup> | Li   | 0.5         | 0.5       | 0.25      | Average ADP = 0.035                    |                |                |
| T <sup>I</sup>  | Si   | 0.2344(5)   | 0.3555(5) | 0.3870(3) | 0.017436                               | 0.025254       | 0.027473       |
| O1              | O    | 0.1382(6)   | 0.3986(6) | 0         | 0.003171                               | 0.048717       | 0.096815       |
| O2              | O    | 0.2237(5)   | 0.2773(5) | 0.1377(2) | 0.011229                               | 0.045480       | 0.081840       |
| O3              | O    | 0.1672(3)   | 0.5065(4) | 0.1706(2) | 0.028474                               | 0.031663       | 0.040589       |

## Supplementary S2. Observed and simulated impedance spectra of Sugilite#2.

T = 615- 676 K: fitting is made with two serially connected RC-circuits

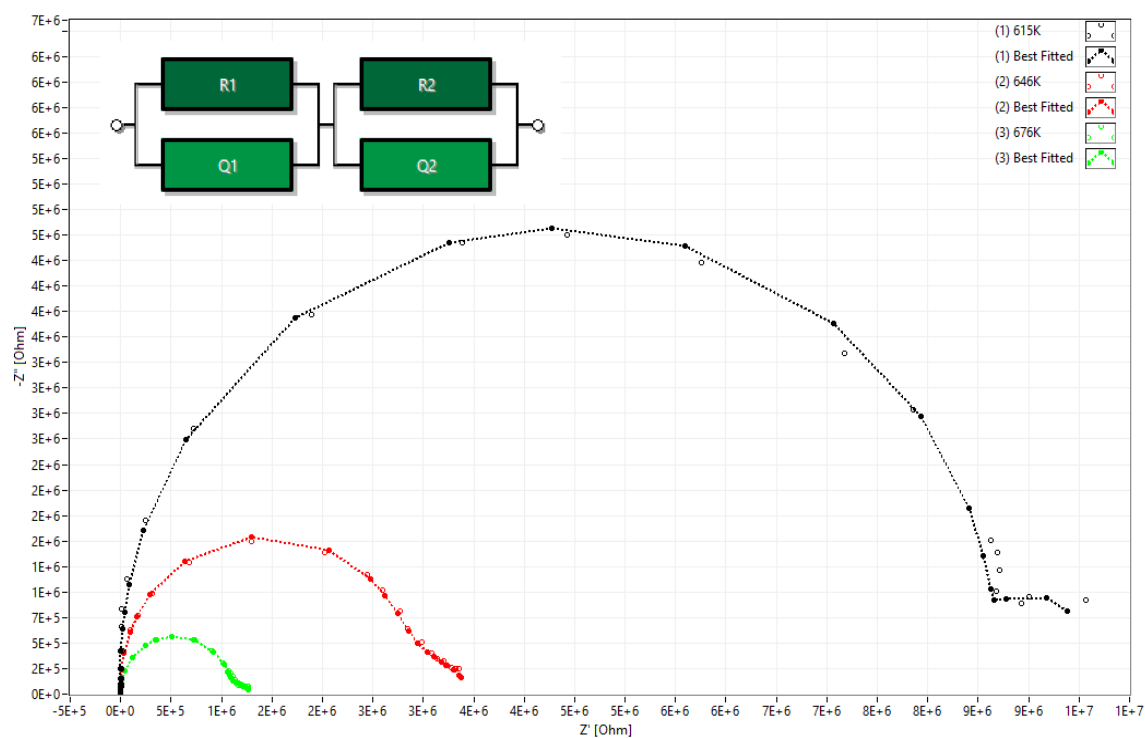

T = 707 – 827 K: fitting is made with two serially connected RC-circuits

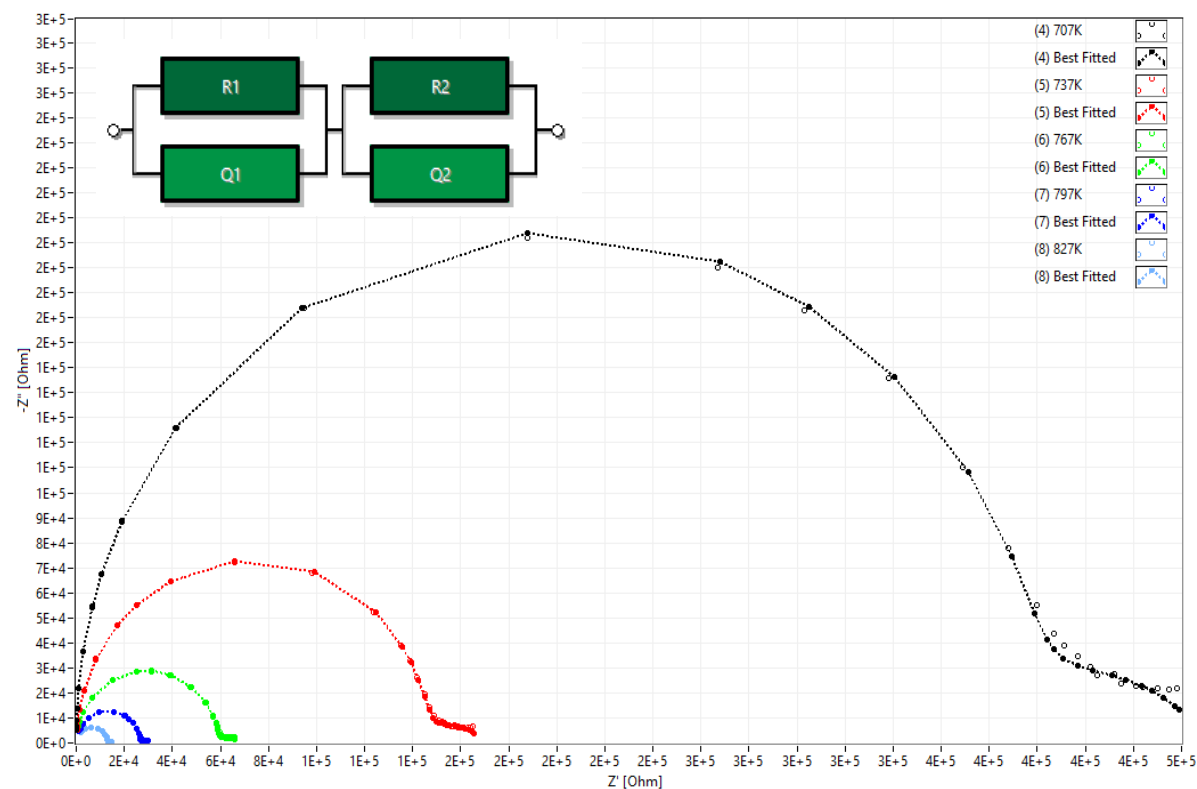

857 – 1064 K: fitting is made with an additional Warburg impedance element(W) which describes a contribution to

impedance caused by diffusion to and from an electrode (Pt in our case). This fitting support ionic bulk conductivity in Sugilite#2.

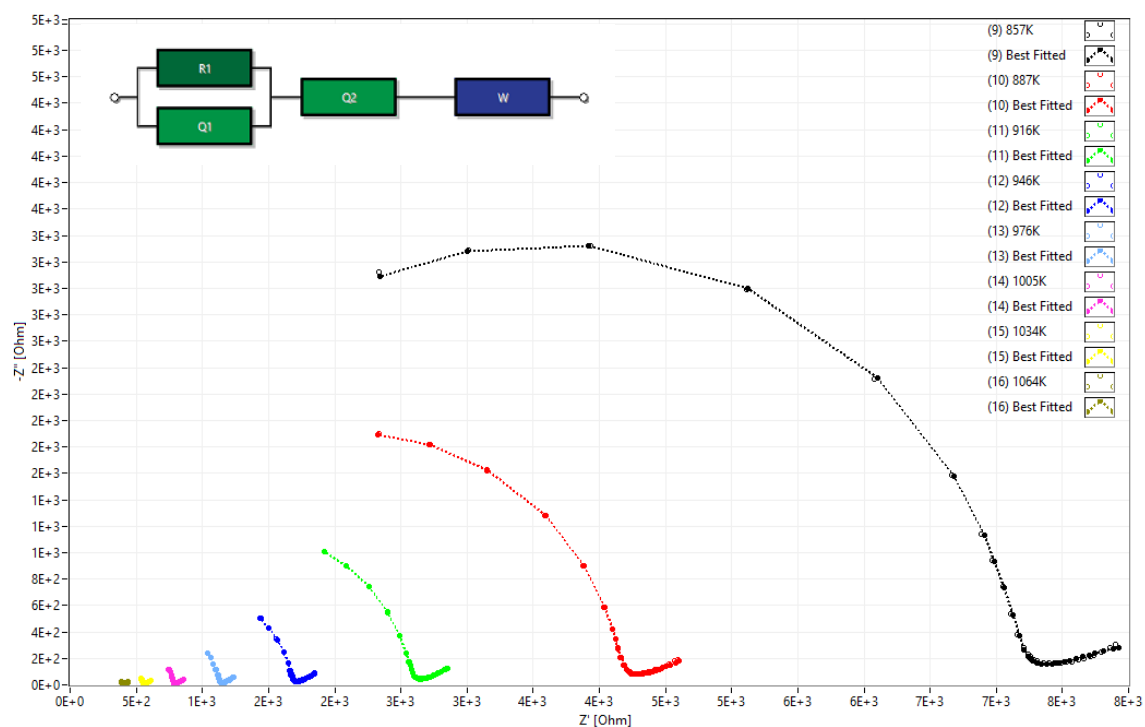

**Supplementary S3.** Change of the lattice metrics  $a$  and  $c$  in  $\text{\AA}$  in sugilite with increasing temperatures, determined by synchrotron X-ray single crystals diffraction data of Sugilite#1.

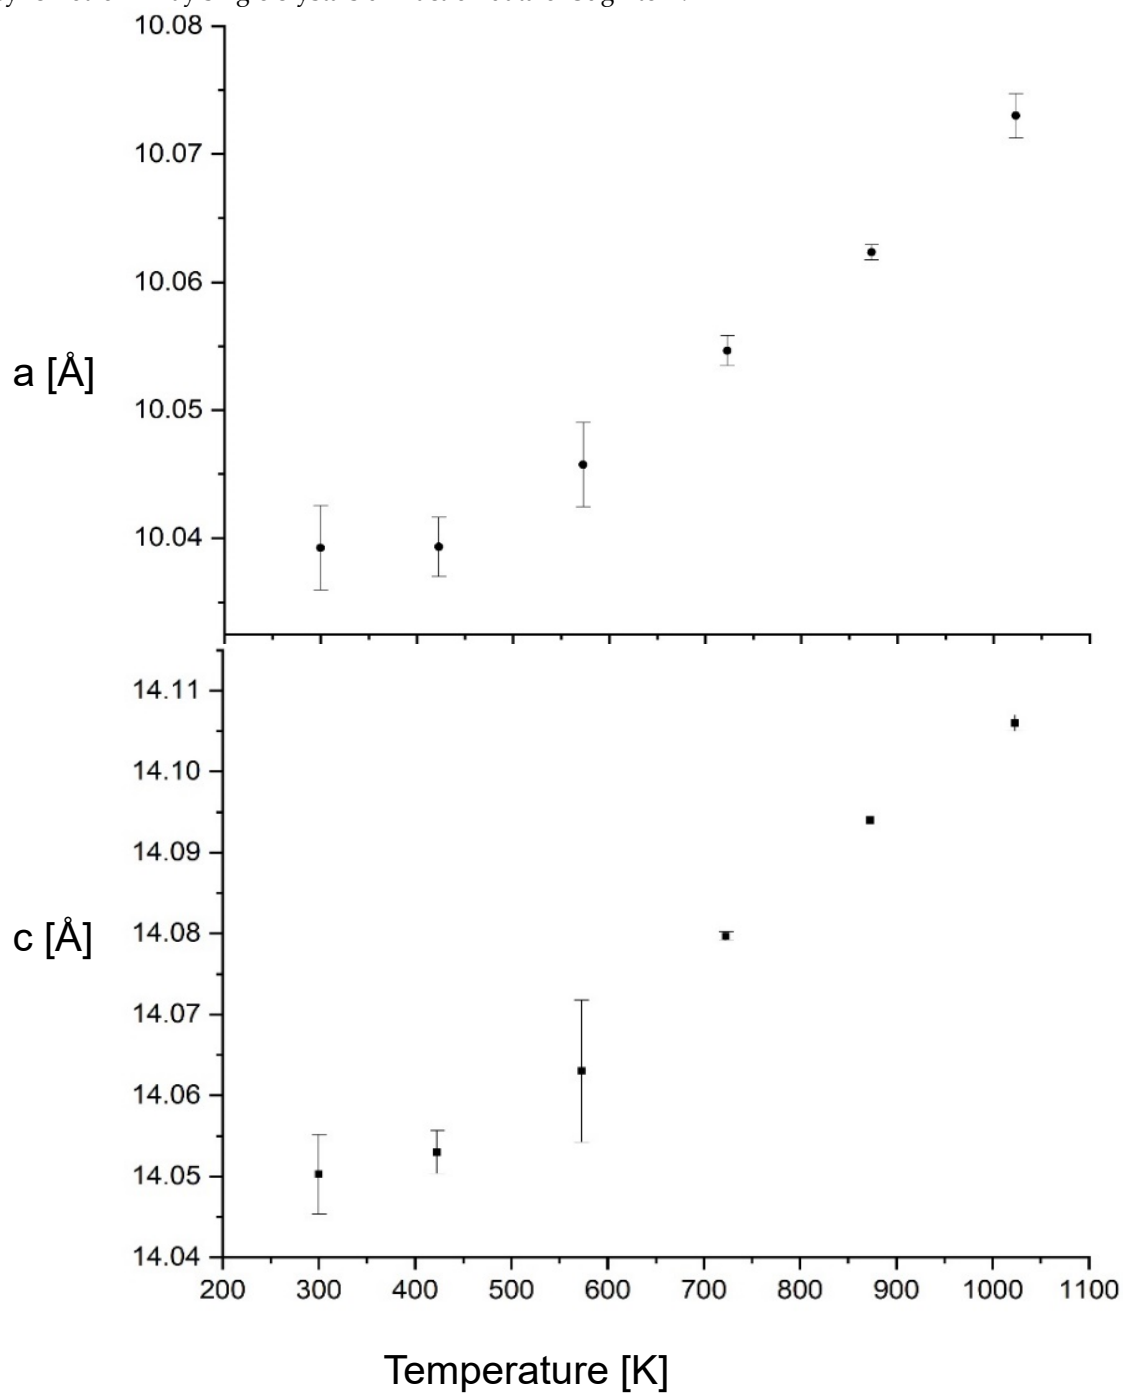

**Supplementary S4.** Observed Fourier maps evaluated with synchrotron X-ray single crystal diffraction data of Sugilite#1 without Na at B sites at all measuring temperatures from 298 up to 1023 K.

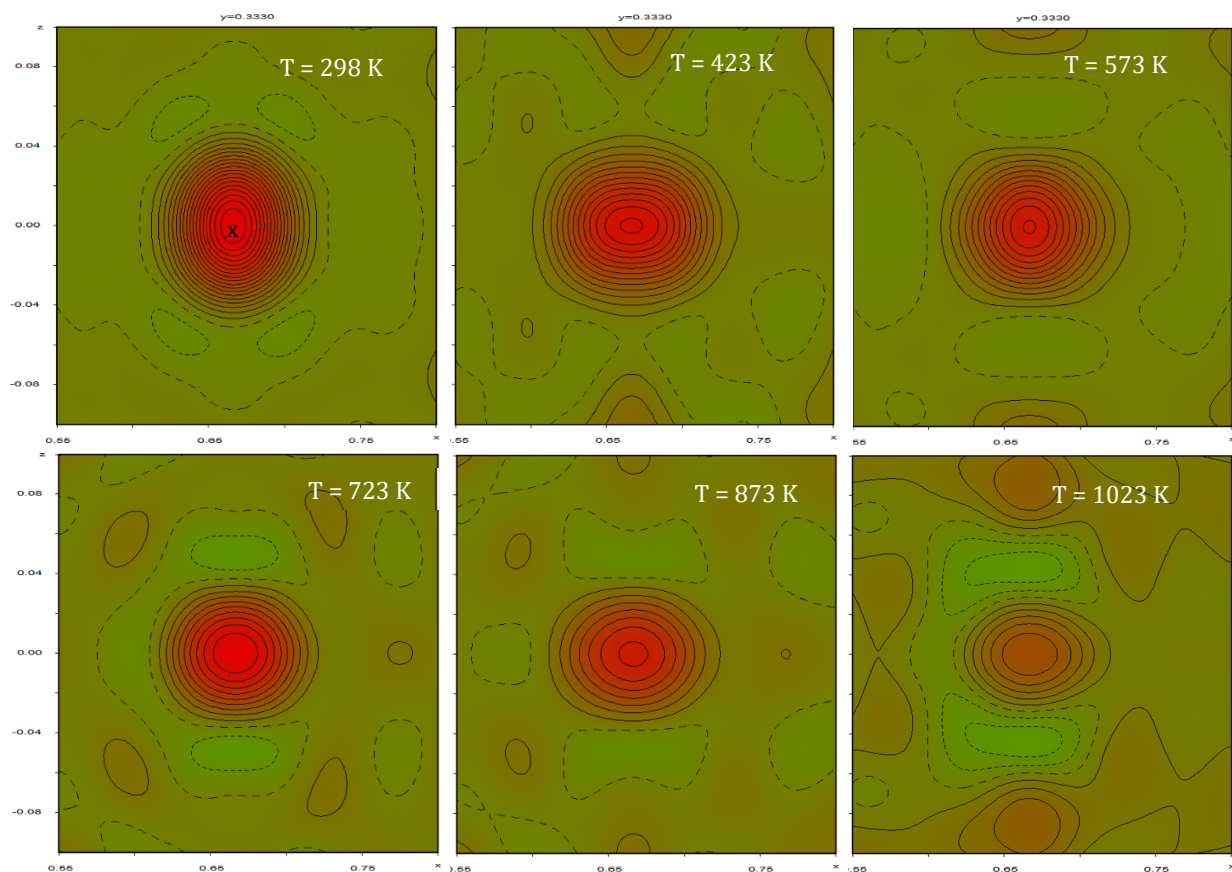

**Supplementary S5.** Components of harmonic ADP parameters  $U_{ij}$  which are the mean square displacements\*, refined with synchrotron XSD data of Sugilite#2.

| Site      | T[K] | $U_{11}$    | $U_{22}$    | $U_{33}$    | $U_{12}$     | $U_{13}$ | $U_{23}$ |
|-----------|------|-------------|-------------|-------------|--------------|----------|----------|
| A<br>(Fe) | 298  | 0.01845 (3) | 0.01845 (3) | 0.01912 (7) | 0.00923 (1)  | 0        | 0        |
|           | 423  | 0.02030 (3) | 0.02030 (3) | 0.0211 (1)  | 0.01015 (1)  |          |          |
|           | 573  | 0.02189 (3) | 0.02189 (3) | 0.0236 (1)  | 0.01095 (2)  |          |          |
|           | 723  | 0.02424 (2) | 0.02424 (2) | 0.02572 (6) | 0.01212 (1)  |          |          |
|           | 873  | 0.02671 (2) | 0.02671 (2) | 0.02813 (7) | 0.01335 (1)  |          |          |
|           | 1023 | 0.02967(2)  | 0.02967(2)  | 0.03139(6)  | 0.014833(11) |          |          |
| B<br>(Na) | 298  | 0.0302 (2)  | 0.0302 (2)  | 0.090 (1)   | 0.015 (1)    | 0        | 0        |
|           | 423  | 0.0368 (2)  | 0.0368 (2)  | 0.103 (1)   | 0.0184 (1)   |          |          |
|           | 573  | 0.0427 (3)  | 0.0427 (3)  | 0.108 (1)   | 0.0214 (1)   |          |          |
|           | 723  | 0.0493 (2)  | 0.0493 (2)  | 0.132 (2)   | 0.0247 (1)   |          |          |
|           | 873  | 0.0567 (3)  | 0.0567 (3)  | 0.145 (2)   | 0.0284 (2)   |          |          |
|           | 1023 | 0.0643 (3)  | 0.0643 (3)  | 0.123 (1)   | 0.0321 (5)   |          |          |
| C (K)     | 298  | 0.0291 (1)  | 0.0291 (1)  | 0.0335 (2)  | 0.0146 (1)   | 0        | 0        |
|           | 423  | 0.0352 (1)  | 0.0351(1)   | 0.0407 (3)  | 0.0176 (1)   |          |          |
|           | 573  | 0.0388 (1)  | 0.0388 (1)  | 0.0456 (4)  | 0.0194 (1)   |          |          |
|           | 723  | 0.0471 (1)  | 0.0471 (1)  | 0.0561 (4)  | 0.0236 (1)   |          |          |
|           | 873  | 0.0535 (1)  | 0.0535 (1)  | 0.0637 (4)  | 0.0267 (1)   |          |          |
|           | 1023 | 0.06131(15) | 0.06131(15) | 0.0741(4)   | 0.03065(8)   |          |          |

|               |      |             |             |             |             |             |             |
|---------------|------|-------------|-------------|-------------|-------------|-------------|-------------|
| T(II)<br>(Li) | 298  | 0.0281 (5)  | 0.0214 (5)  | 0.026 (1)   | 0.0107 (2)  | 0           | 0           |
|               | 423  | 0.0336 (7)  | 0.0247 (6)  | 0.034 (1)   | 0.0123 (3)  |             |             |
|               | 573  | 0.0414 (9)  | 0.0298 (9)  | 0.050 (9)   | 0.0149 (9)  |             |             |
|               | 723  | 0.0481 (8)  | 0.0311 (6)  | 0.045 (2)   | 0.0155 (3)  |             |             |
|               | 873  | 0.0590 (1)  | 0.0353 (7)  | 0.053 (2)   | 0.0177 (4)  |             |             |
| T(I)<br>(Si)  | 1023 | 0.0758 (15) | 0.0390 (8)  | 0.060 (2)   | 0.0195 (4)  | 0           | 0           |
|               | 298  | 0.01906 (3) | 0.01858 (3) | 0.01909 (6) | 0.00941 (2) |             |             |
|               | 423  | 0.02094 (3) | 0.02031 (3) | 0.02096 (9) | 0.01029 (3) |             |             |
|               | 573  | 0.02252 (4) | 0.02184 (4) | 0.0235 (1)  | 0.01108 (3) |             |             |
|               | 723  | 0.02482 (3) | 0.02381 (3) | 0.02487 (6) | 0.01206 (2) |             |             |
|               | 873  | 0.02714 (3) | 0.02592 (3) | 0.02703 (6) | 0.01313 (2) |             |             |
|               | 1023 | 0.02999 (3) | 0.02840 (3) | 0.02965 (5) | 0.01444 (2) |             |             |
| O1<br>(O)     | 298  | 0.0308 (1)  | 0.0340 (2)  | 0.0187 (2)  | 0.0152 (1)  | 0           | 0           |
|               | 423  | 0.0371 (2)  | 0.0413 (3)  | 0.0201 (3)  | 0.0181 (1)  |             |             |
|               | 573  | 0.0407 (3)  | 0.0447 (3)  | 0.0233 (4)  | 0.0195 (3)  |             |             |
|               | 723  | 0.0491 (3)  | 0.0555 (3)  | 0.0232 (3)  | 0.0239 (2)  |             |             |
|               | 873  | 0.0547 (3)  | 0.0632 (4)  | 0.0258 (3)  | 0.0265 (3)  |             |             |
| O2<br>(O)     | 1023 | 0.0625 (3)  | 0.0731 (4)  | 0.0277 (3)  | 0.0309 (3)  | -0.0005 (1) | -0.0001 (1) |
|               | 298  | 0.0245 (1)  | 0.0187 (1)  | 0.0313 (2)  | 0.0075 (1)  |             |             |
|               | 423  | 0.0285 (1)  | 0.0203 (1)  | 0.0368 (2)  | 0.0077 (1)  |             |             |
|               | 573  | 0.0312 (1)  | 0.0219 (1)  | 0.0413 (3)  | 0.0080 (1)  |             |             |
|               | 723  | 0.0368 (1)  | 0.02390 (6) | 0.0486 (2)  | 0.00803 (6) |             |             |
| O3<br>(O)     | 873  | 0.0416 (1)  | 0.02614 (7) | 0.0544 (3)  | 0.00829 (7) | -0.0011 (1) | 0.0005 (1)  |
|               | 1023 | 0.0474 (1)  | 0.0290 (1)  | 0.0613 (3)  | 0.0087 (1)  |             |             |
|               | 298  | 0.0214 (1)  | 0.0226 (1)  | 0.0249 (1)  | 0.0108 (1)  |             |             |
|               | 423  | 0.0241 (1)  | 0.0255 (1)  | 0.0289 (2)  | 0.0121 (1)  |             |             |
|               | 573  | 0.0261 (1)  | 0.0278 (1)  | 0.0322 (3)  | 0.0130 (1)  |             |             |
| O3<br>(O)     | 723  | 0.0297 (1)  | 0.0318 (1)  | 0.0374 (2)  | 0.0147 (1)  | 0.0096 (1)  | 0.0043 (1)  |
|               | 873  | 0.0330 (1)  | 0.0358 (1)  | 0.0417 (2)  | 0.0163 (1)  |             |             |
|               | 1023 | 0.0367 (1)  | 0.0402 (1)  | 0.0480 (2)  | 0.0181 (1)  |             |             |

\*related to  $\beta^{11} h^2 + \beta^{22} k^2 + \beta^{33} l^2 + 2\beta^{12} hk + 2\beta^{13} hl + 2\beta^{23} kl$ :  $\beta^{11} = 2\pi^2 U^{11} a^{*2}$ ,  $\beta^{22} = 2\pi^2 U^{22} b^{*2}$ ,  $\beta^{33} = 2\pi^2 U^{33} c^{*2}$ ,  $\beta^{12} = 2\pi^2 U^{12} a^* b^* \cos \gamma^*$ ,  $\beta^{13} = 2\pi^2 U^{13} a^* c^* \cos \beta^*$ ,  $\beta^{23} = 2\pi^2 U^{23} b^* c^* \cos \alpha^*$ .

## Supplementary S6. Principle mean square APDs from SXD data of Sugilite#1

### 6.1 ADP eigenvalues and eigenvectors at 298 K

Eigenvalues [ $\text{\AA}^2$ ] and eigenvectors are related to the orthonormal system defined by the following transformation matrix:

|         |         |         |
|---------|---------|---------|
| 10.0390 | -5.0195 | 0.0000  |
| 0.0000  | 8.6940  | 0.0000  |
| 0.0000  | 0.0000  | 14.0500 |

| Atom | Eigenvalues | Eigenvectors |           |           |
|------|-------------|--------------|-----------|-----------|
| K    | 0.029127    | 0.000000     | 1.000000  | 0.000000  |
|      | 0.029127    | 1.000000     | 0.000000  | 0.000000  |
|      | 0.033484    | 0.000000     | 0.000000  | 1.000000  |
| Fe   | 0.018450    | 0.000000     | 1.000000  | 0.000000  |
|      | 0.018450    | 1.000000     | 0.000000  | 0.000000  |
|      | 0.019119    | 0.000000     | 0.000000  | 1.000000  |
| Li   | 0.021403    | 0.000000     | 1.000000  | 0.000000  |
|      | 0.026375    | 0.000000     | 0.000000  | 1.000000  |
|      | 0.030310    | 1.000000     | 0.000000  | 0.000000  |
| Si   | 0.018367    | 0.674031     | 0.213608  | -0.707144 |
|      | 0.018541    | -0.286801    | 0.957857  | 0.015970  |
|      | 0.019820    | 0.680755     | 0.192046  | 0.706889  |
| O1   | 0.018719    | 0.000000     | 0.000000  | 1.000000  |
|      | 0.030814    | 0.830354     | 0.557236  | 0.000000  |
|      | 0.035442    | -0.557236    | 0.830354  | 0.000000  |
| O2   | 0.018232    | -0.198707    | -0.980017 | -0.009059 |
|      | 0.029192    | -0.946725    | 0.194330  | -0.256805 |
|      | 0.031416    | -0.253433    | 0.042453  | 0.966421  |
| O3   | 0.018630    | 0.767014     | 0.323865  | -0.553896 |
|      | 0.022867    | -0.383113    | 0.923652  | 0.009544  |
|      | 0.027686    | 0.514698     | 0.204884  | 0.832531  |
| Na   | 0.030231    | 0.000000     | 1.000000  | 0.000000  |
|      | 0.030231    | 1.000000     | 0.000000  | 0.000000  |
|      | 0.090218    | 0.000000     | 0.000000  | 1.000000  |

### 6.2 ADP eigenvalues and eigenvectors at 423 K

Eigenvalues [ $\text{\AA}^2$ ] and eigenvectors are related to the orthonormal system defined by the following transformation matrix:

|         |         |         |
|---------|---------|---------|
| 10.0390 | -5.0195 | 0.0000  |
| 0.0000  | 8.6940  | 0.0000  |
| 0.0000  | 0.0000  | 14.0530 |

| Atom | Eigenvalues | Eigenvectors |          |          |
|------|-------------|--------------|----------|----------|
| K    | 0.035162    | 1.000000     | 0.000000 | 0.000000 |
|      | 0.035162    | 0.000000     | 1.000000 | 0.000000 |
|      | 0.040670    | 0.000000     | 0.000000 | 1.000000 |
| Fe   | 0.020298    | 1.000000     | 0.000000 | 0.000000 |
|      | 0.020298    | 0.000000     | 1.000000 | 0.000000 |
|      | 0.021094    | 0.000000     | 0.000000 | 1.000000 |
| Li   | 0.024671    | 0.000000     | 1.000000 | 0.000000 |

|    |          |           |           |           |
|----|----------|-----------|-----------|-----------|
|    | 0.033660 | 0.000000  | 0.000000  | 1.000000  |
|    | 0.036566 | 1.000000  | 0.000000  | 0.000000  |
| Si | 0.019911 | 0.634909  | 0.310099  | -0.707622 |
|    | 0.020282 | -0.353352 | 0.931057  | 0.090971  |
|    | 0.022040 | 0.687047  | 0.192281  | 0.700710  |
| O1 | 0.020101 | 0.000000  | 0.000000  | 1.000000  |
|    | 0.037008 | 0.821320  | 0.570468  | 0.000000  |
|    | 0.043367 | -0.570468 | 0.821320  | 0.000000  |
| O2 | 0.019756 | -0.191222 | -0.981547 | -0.000835 |
|    | 0.034865 | -0.928105 | 0.181088  | -0.325313 |
|    | 0.036989 | -0.319461 | 0.061432  | 0.945606  |
| O3 | 0.019989 | 0.738082  | 0.373615  | -0.561825 |
|    | 0.025928 | -0.438892 | 0.898299  | 0.020789  |
|    | 0.033039 | 0.512454  | 0.231237  | 0.826995  |
| Na | 0.036828 | 1.000000  | 0.000000  | 0.000000  |
|    | 0.036828 | 0.000000  | 1.000000  | 0.000000  |
|    | 0.103267 | 0.000000  | 0.000000  | 1.000000  |

### 6.3 ADP eigenvalues and eigenvectors at 573 K

Eigenvalues [ $\text{\AA}^2$ ] and eigenvectors are related to the orthonormal system defined by the following transformation matrix:

|      |             |              |           |           |
|------|-------------|--------------|-----------|-----------|
|      |             | 10.0460      | -5.0230   | 0.0000    |
|      |             | 0.0000       | 8.7001    | 0.0000    |
|      |             | 0.0000       | 0.0000    | 14.0630   |
| Atom | Eigenvalues | Eigenvectors |           |           |
| K    | 0.038829    | 0.000000     | 1.000000  | 0.000000  |
|      | 0.038829    | 1.000000     | 0.000000  | 0.000000  |
|      | 0.045623    | 0.000000     | 0.000000  | 1.000000  |
| Fe   | 0.021892    | -0.334030    | -0.942562 | -0.000000 |
|      | 0.021892    | -0.942562    | 0.334030  | 0.000000  |
|      | 0.023614    | 0.000000     | 0.000000  | 1.000000  |
| Li   | 0.029761    | 0.000000     | 1.000000  | 0.000000  |
|      | 0.045292    | 1.000000     | 0.000000  | 0.000000  |
|      | 0.049901    | 0.000000     | 0.000000  | 1.000000  |
| Si   | 0.021685    | -0.438472    | -0.773173 | 0.458199  |
|      | 0.021872    | 0.719800     | -0.607388 | -0.336107 |
|      | 0.024327    | 0.538173     | 0.182439  | 0.822852  |
| O1   | 0.023314    | 0.000000     | 0.000000  | 1.000000  |
|      | 0.040542    | 0.781171     | 0.624317  | 0.000000  |
|      | 0.047284    | -0.624317    | 0.781171  | 0.000000  |
| O2   | 0.021198    | -0.195148    | -0.980663 | 0.014700  |
|      | 0.038702    | -0.959565    | 0.187806  | -0.209674 |
|      | 0.041391    | -0.202859    | 0.055023  | 0.977661  |
| O3   | 0.021592    | 0.744493     | 0.384990  | -0.545448 |
|      | 0.028433    | -0.440698    | 0.897096  | 0.031674  |
|      | 0.036747    | 0.501513     | 0.216796  | 0.837546  |



|    |          |          |          |          |
|----|----------|----------|----------|----------|
| Na | 0.042703 | 0.000000 | 1.000000 | 0.000000 |
|    | 0.042703 | 1.000000 | 0.000000 | 0.000000 |
|    | 0.107562 | 0.000000 | 0.000000 | 1.000000 |

#### 6.4 ADP eigenvalues and eigenvectors at 723 K

Eigenvalues [ $\text{\AA}^2$ ] and eigenvectors are related to the orthonormal system defined by the following transformation matrix:

|      |             | 10.0550      | -5.0275   | 0.0000    |
|------|-------------|--------------|-----------|-----------|
|      |             | 0.0000       | 8.7079    | 0.0000    |
|      |             | 0.0000       | 0.0000    | 14.0800   |
| Atom | Eigenvalues | Eigenvectors |           |           |
| K    | 0.047097    | 0.707107     | 0.707107  | 0.000000  |
|      | 0.047097    | -0.707107    | 0.707107  | 0.000000  |
|      | 0.056073    | 0.000000     | 0.000000  | 1.000000  |
| Fe   | 0.024238    | 0.804589     | 0.593833  | 0.000000  |
|      | 0.024238    | -0.593833    | 0.804589  | 0.000000  |
|      | 0.025715    | 0.000000     | 0.000000  | 1.000000  |
| Li   | 0.031082    | 0.000000     | 1.000000  | 0.000000  |
|      | 0.044742    | 0.000000     | 0.000000  | 1.000000  |
|      | 0.053760    | 1.000000     | 0.000000  | 0.000000  |
| Si   | 0.023176    | -0.586369    | -0.421196 | 0.691928  |
|      | 0.023841    | 0.416153     | -0.889481 | -0.188787 |
|      | 0.026619    | 0.694973     | 0.177249  | 0.696846  |
| O1   | 0.023185    | 0.000000     | 0.000000  | 1.000000  |
|      | 0.049080    | 0.823533     | 0.567269  | 0.000000  |
|      | 0.058502    | -0.567269    | 0.823533  | 0.000000  |
| O2   | 0.023018    | -0.190729    | -0.981642 | 0.001342  |
|      | 0.046374    | -0.836388    | 0.161791  | -0.523717 |
|      | 0.049413    | -0.513885    | 0.101010  | 0.851891  |
| O3   | 0.023224    | 0.728473     | 0.393495  | -0.560793 |
|      | 0.032657    | -0.457501    | 0.888726  | 0.029301  |
|      | 0.043972    | 0.509922     | 0.235218  | 0.827437  |
| Na   | 0.049292    | 0.804589     | 0.593833  | 0.000000  |
|      | 0.049292    | -0.593833    | 0.804589  | 0.000000  |
|      | 0.131869    | 0.000000     | 0.000000  | 1.000000  |

#### 6.5 ADP eigenvalues and eigenvectors at 873 K

Eigenvalues [ $\text{\AA}^2$ ] and eigenvectors are related to the orthonormal system defined by the following transformation matrix:

|      |             | 10.0620      | -5.0310  | 0.0000   |
|------|-------------|--------------|----------|----------|
|      |             | 0.0000       | 8.7139   | 0.0000   |
|      |             | 0.0000       | 0.0000   | 14.0940  |
| Atom | Eigenvalues | Eigenvectors |          |          |
| K    | 0.053521    | 0.000000     | 1.000000 | 0.000000 |
|      | 0.053521    | 1.000000     | 0.000000 | 0.000000 |
|      | 0.063717    | 0.000000     | 0.000000 | 1.000000 |

|    |          |           |           |           |
|----|----------|-----------|-----------|-----------|
| Fe | 0.026707 | 0.000000  | 1.000000  | 0.000000  |
|    | 0.026707 | 1.000000  | 0.000000  | 0.000000  |
|    | 0.028135 | 0.000000  | 0.000000  | 1.000000  |
| Li | 0.035321 | 0.000000  | 1.000000  | 0.000000  |
|    | 0.052647 | 0.000000  | 0.000000  | 1.000000  |
|    | 0.066801 | 1.000000  | 0.000000  | 0.000000  |
| Si | 0.025119 | -0.571114 | -0.419246 | 0.705735  |
|    | 0.025973 | 0.410165  | -0.890467 | -0.197063 |
|    | 0.029181 | 0.711051  | 0.176922  | 0.680518  |
| O1 | 0.025825 | 0.000000  | 0.000000  | 1.000000  |
|    | 0.054593 | 0.826161  | 0.563434  | 0.000000  |
|    | 0.067214 | -0.563434 | 0.826161  | 0.000000  |
| O2 | 0.025055 | -0.192593 | -0.981263 | 0.005639  |
|    | 0.052740 | -0.716188 | 0.136634  | -0.684402 |
|    | 0.055862 | -0.670807 | 0.135850  | 0.729083  |
| O3 | 0.025184 | 0.719540  | 0.401466  | -0.566645 |
|    | 0.036873 | -0.469922 | 0.882252  | 0.028354  |
|    | 0.049556 | 0.511306  | 0.245877  | 0.823474  |
| Na | 0.056717 | 1.000000  | 0.000000  | 0.000000  |
|    | 0.056717 | 0.000000  | 1.000000  | 0.000000  |
|    | 0.145218 | 0.000000  | 0.000000  | 1.000000  |

#### 6.6 ADP eigenvalues and eigenvectors at 1023 K

Eigenvalues [ $\text{\AA}^2$ ] and eigenvectors are related to the orthonormal system defined by the following transformation matrix:

|      |             | 10.0730      | -5.0365   | 0.0000    |
|------|-------------|--------------|-----------|-----------|
|      |             | 0.0000       | 8.7235    | 0.0000    |
|      |             | 0.0000       | 0.0000    | 14.1060   |
| Atom | Eigenvalues | Eigenvectors |           |           |
| K    | 0.061305    | 0.000000     | 1.000000  | 0.000000  |
|      | 0.061305    | 1.000000     | 0.000000  | 0.000000  |
|      | 0.074057    | 0.000000     | 0.000000  | 1.000000  |
| Fe   | 0.029666    | 0.000000     | 1.000000  | 0.000000  |
|      | 0.029666    | 1.000000     | 0.000000  | 0.000000  |
|      | 0.031388    | 0.000000     | 0.000000  | 1.000000  |
| Li   | 0.038972    | 0.000000     | 1.000000  | 0.000000  |
|      | 0.060320    | 0.000000     | 0.000000  | 1.000000  |
|      | 0.088057    | 1.000000     | 0.000000  | 0.000000  |
| Si   | 0.027406    | -0.516333    | -0.485525 | 0.705454  |
|      | 0.028503    | 0.462333     | -0.851434 | -0.247606 |
|      | 0.032348    | 0.720866     | 0.198307  | 0.664098  |
| O1   | 0.027675    | 0.000000     | 0.000000  | 1.000000  |
|      | 0.062486    | 0.851615     | 0.524168  | 0.000000  |
|      | 0.077064    | -0.524168    | 0.851615  | 0.000000  |
| O2   | 0.027634    | -0.193519    | -0.981095 | 0.001693  |
|      | 0.060750    | -0.480464    | 0.093266  | -0.872041 |

|    |          |           |           |           |
|----|----------|-----------|-----------|-----------|
|    | 0.062991 | 0.855398  | -0.169570 | -0.489429 |
| O3 | 0.027620 | 0.734168  | 0.390732  | -0.555271 |
|    | 0.041661 | -0.443686 | 0.895138  | 0.043255  |
|    | 0.057160 | 0.513945  | 0.214609  | 0.830544  |
| Na | 0.064275 | 0.000000  | 1.000000  | 0.000000  |
|    | 0.064275 | 1.000000  | 0.000000  | 0.000000  |
|    | 0.123221 | 0.000000  | 0.000000  | 1.000000  |

**Supplementary S7. The Bond-Valence parameters ( $d_0, B_0$ ) for Zachariasen formula ( $s = \exp((d_0 - d)/B_0)$ ) applied in this study.**

Type 1: FE+3 with type 5: O-2  $d_0 = 1.759$   $B_0 = 0.370$  => Reference: Brown and Altermatt, (1985), Acta Cryst. B41, 244-247 (empirical)

Cation (Eff. radius): FE+3( 0.640) Anion (Eff. radius): O-2 ( 1.400)

Type 2: LI+1 with type 5: O-2  $d_0 = 1.466$   $B_0 = 0.370$  => Reference: Brown and Altermatt, (1985), Acta Cryst. B41, 244-247 (empirical)

Cation (Eff. radius): LI+1( 0.600) Anion (Eff. radius): O-2 ( 1.400)

Type 3: NA+1 with type 5: O-2  $d_0 = 1.803$   $B_0 = 0.370$  => Reference: Brown and Altermatt, (1985), Acta Cryst. B41, 244-247 (empirical)

Cation (Eff. radius): NA+1( 0.950) Anion (Eff. radius): O-2 ( 1.400)

Type 4: SI+4 with type 5: O-2  $d_0 = 1.624$   $B_0 = 0.370$  => Reference: Brese and O'Keeffe, (1991), Acta Cryst. B47, 192-197 (extrapolated)

Cation (Eff. radius): SI+4( 0.410) Anion (Eff. radius): O-2 ( 1.400)
